# Supplementary material for: Destabilization of Indomethacin-Paracetamol Co-Amorphous Systems by Mechanical Stress
Source: MDPI journal article supplement (doi:10.3390/pharmaceutics16010067), 2023-12-31

# Supplementary Materials: Destabilization of Indomethacin-Paracetamol Co-Amorphous Systems by Mechanical Stress

Rong Di, Thomas Rades \* and Holger Grohgan

**Figure S1.** VT-XRPD diffractograms of IND – PAR PM with different drug ratios.

(10% IND – 90% PAR).

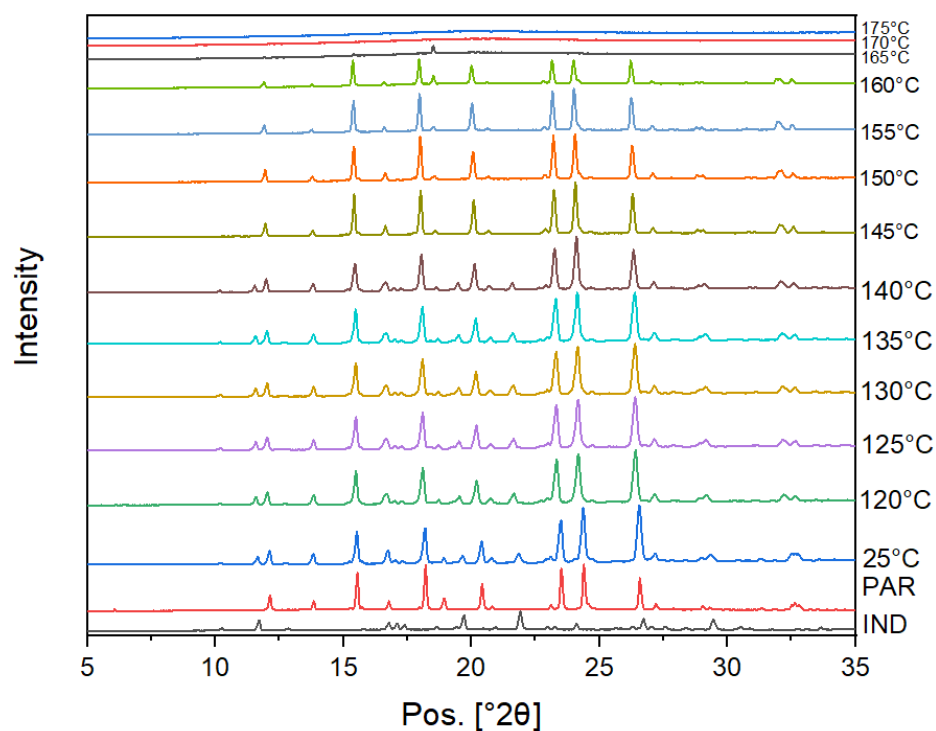

20% IND – 80% PAR

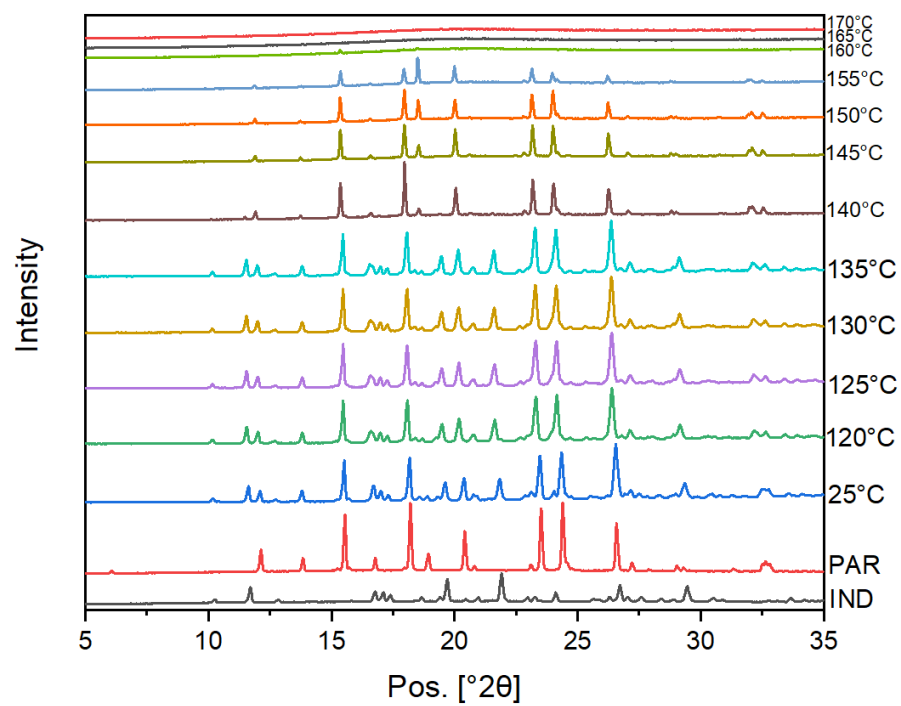

30% IND – 70% PAR

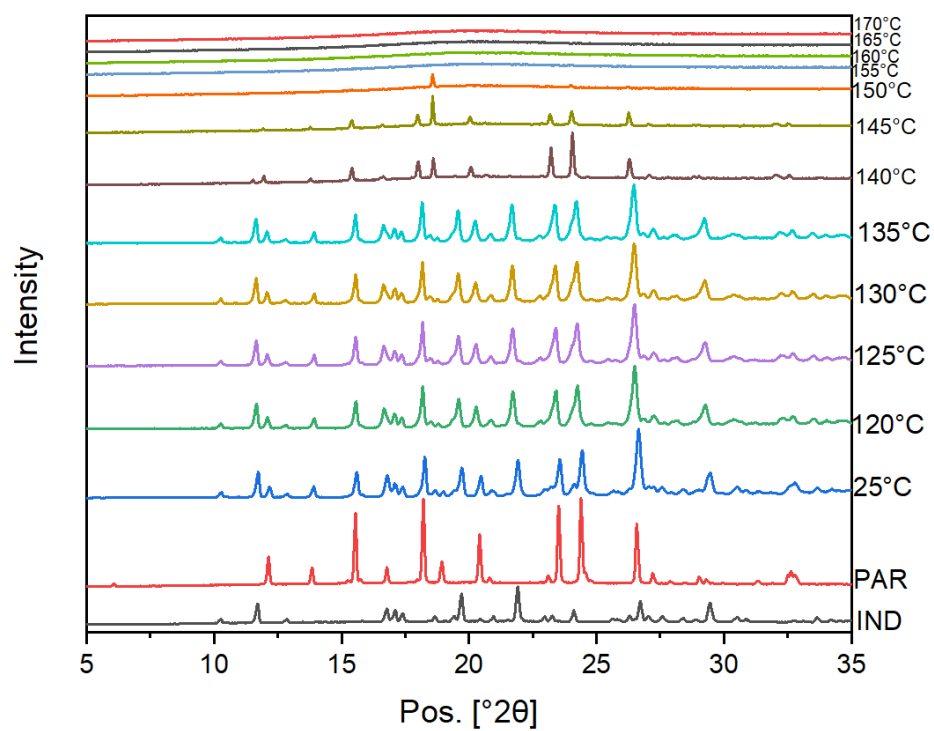

70% IND – 30% PAR

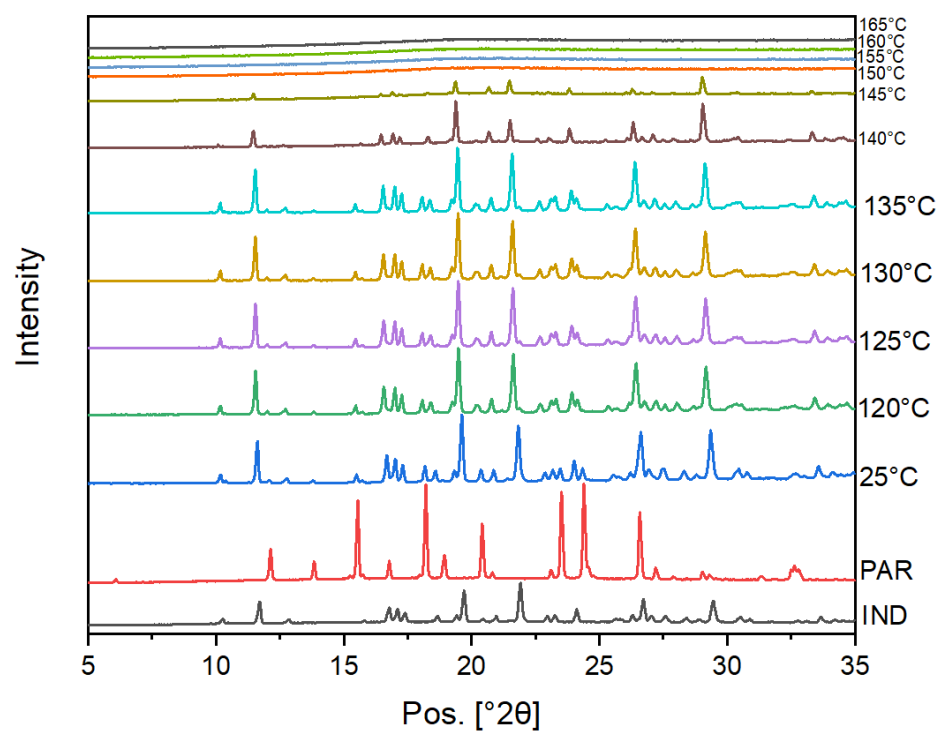

80% IND – 20% PAR

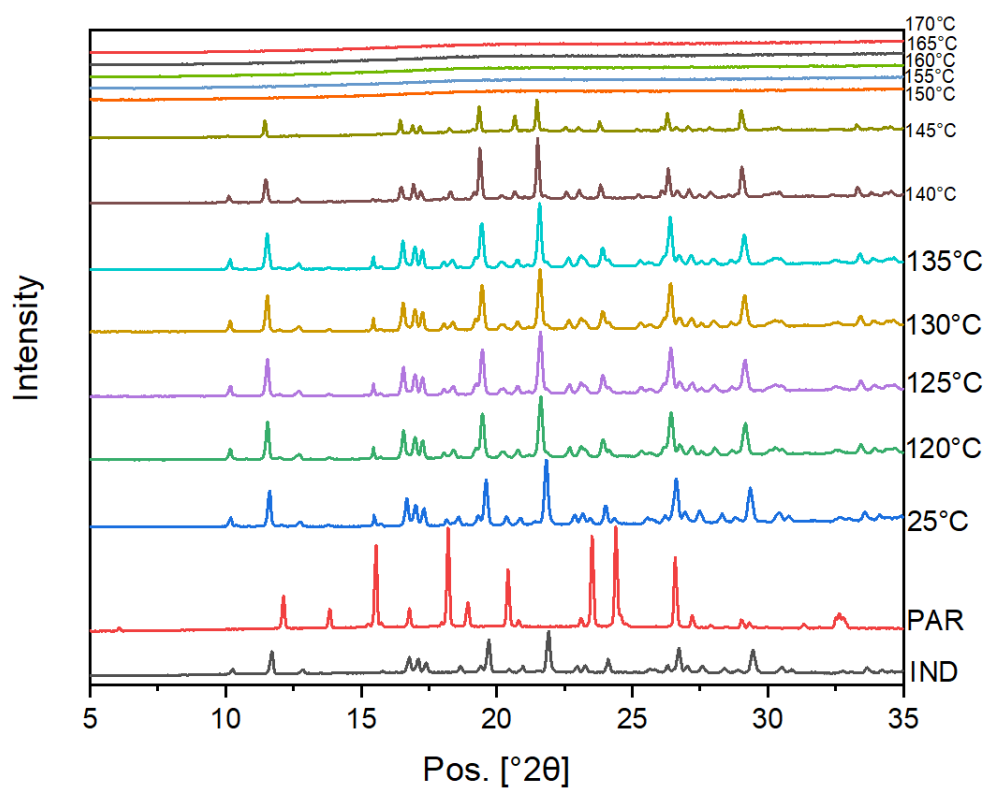

90% IND – 10% PAR

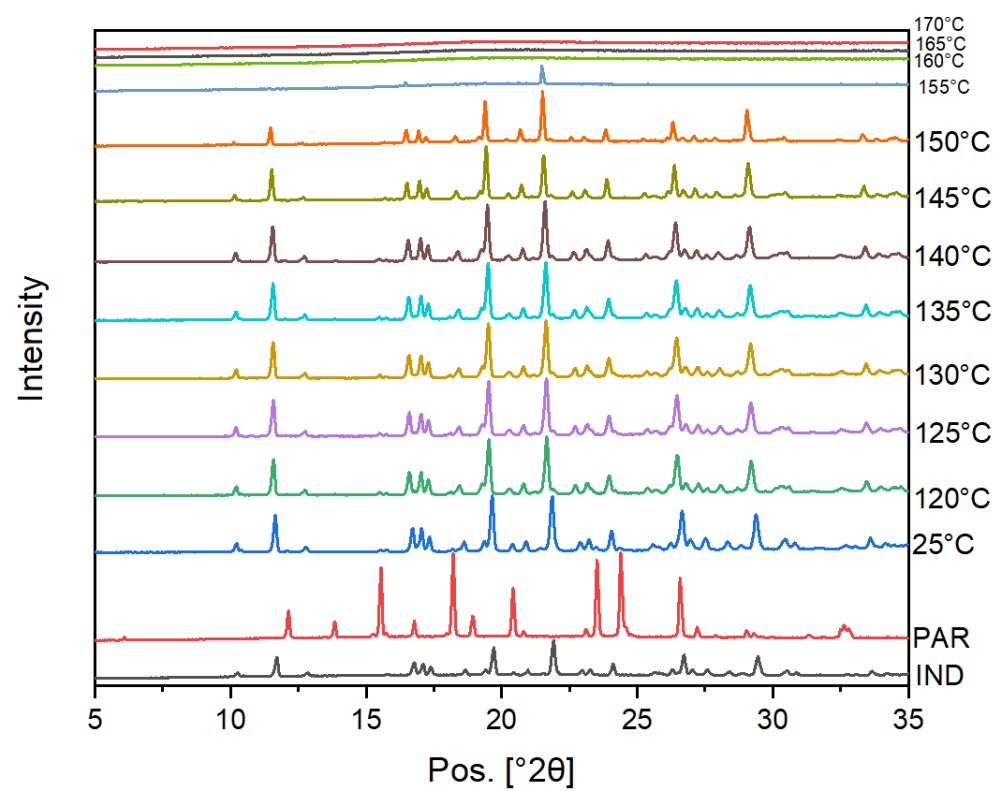

**Figure S2.** Comparison of the theoretical  $T_g$  (calculated with the Gordon–Taylor equation) and the experimental  $T_g$  (obtained from DSC results) of IND – PAR co-amorphous systems at different mixing ratios (from 90% IND – 10% PAR to 10% IND – 90% PAR (mol/mol)). The  $T_g$  of amorphous IND and amorphous PAR were obtained from DSC measurements.

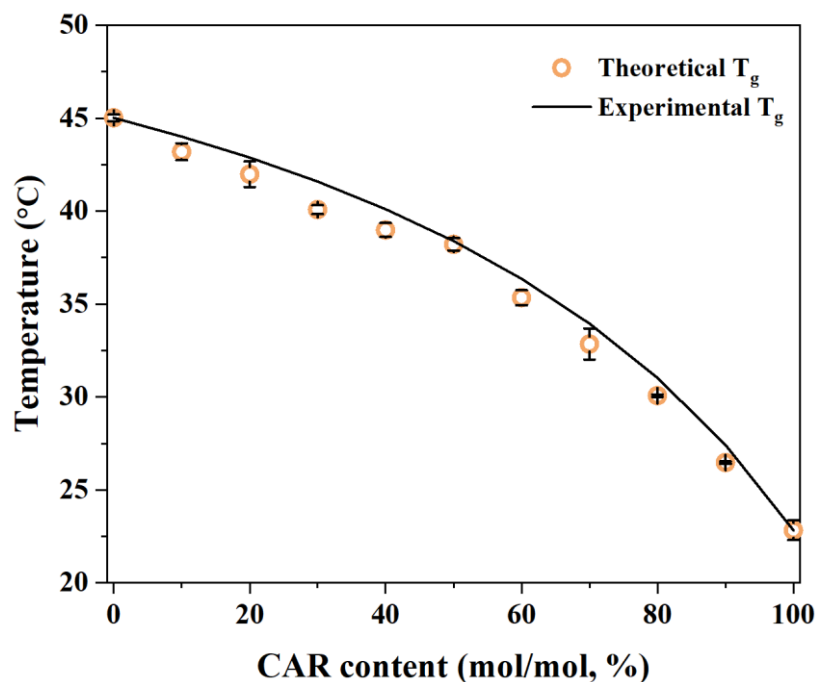

**Figure S3.** Stability test results of IND – PAR CAMS with various mixing ratios (from 90% IND – 10% PAR to 10% IND – 90% PAR (mol/mol)). The XRPD diffractograms of crystalline IND and crystalline PAR are also shown in the figure. Black arrows indicate crystalline reflections. "w" in the figure represents "week.".

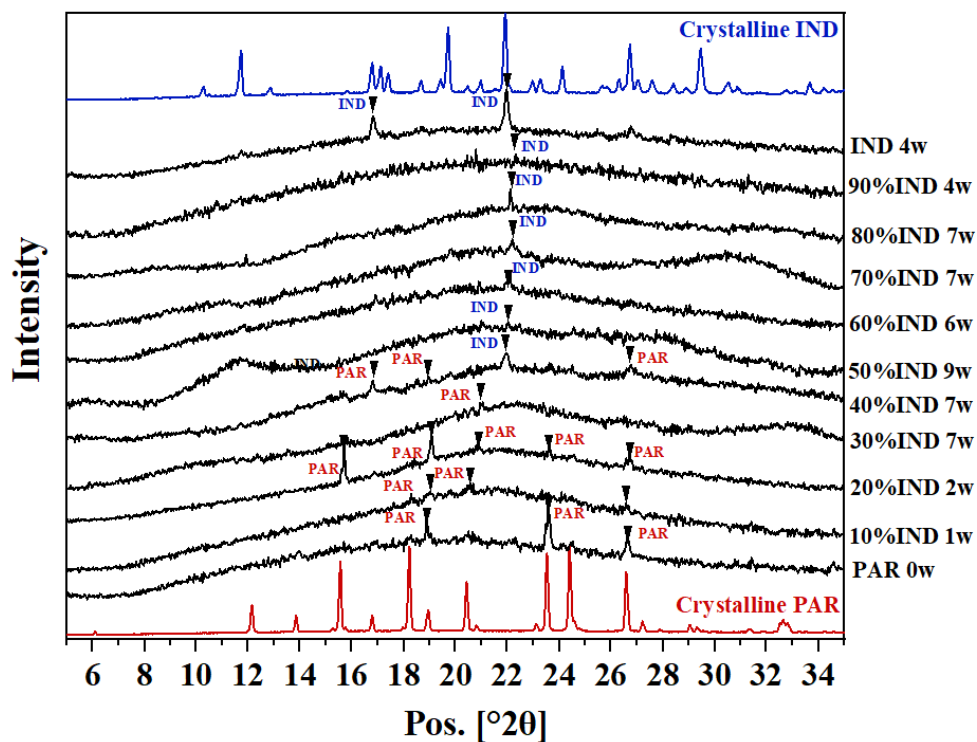

**Figure S4.** TGA results of CAMS and G-CAMS with different mixing ratios.

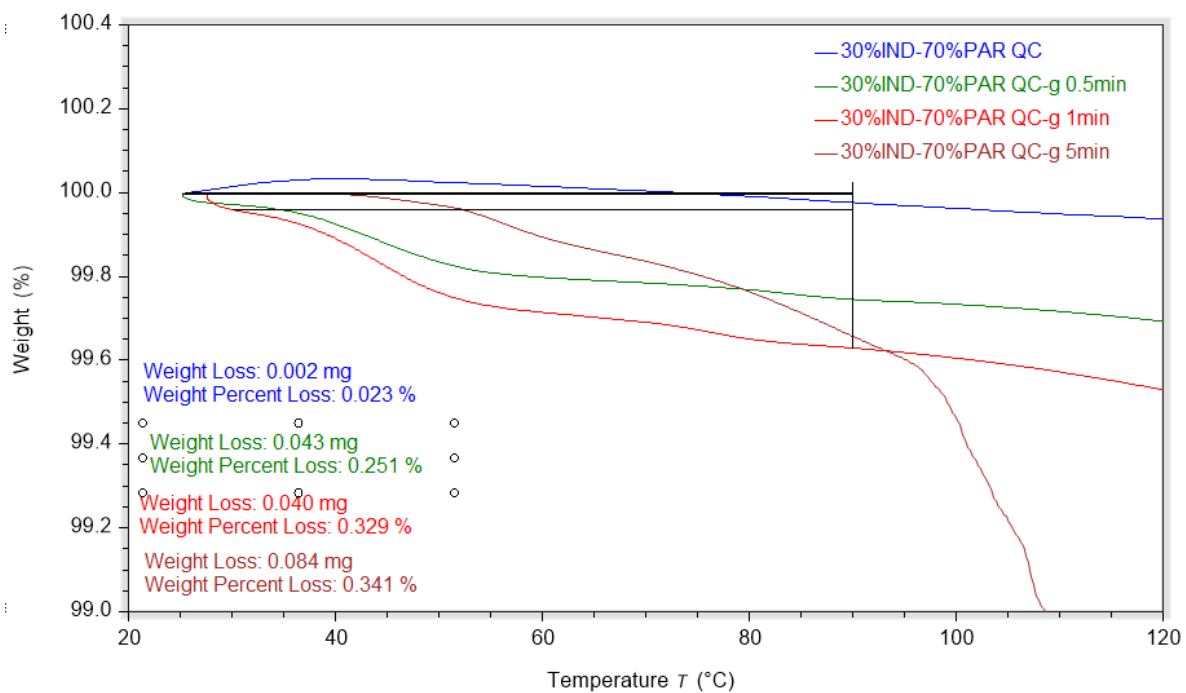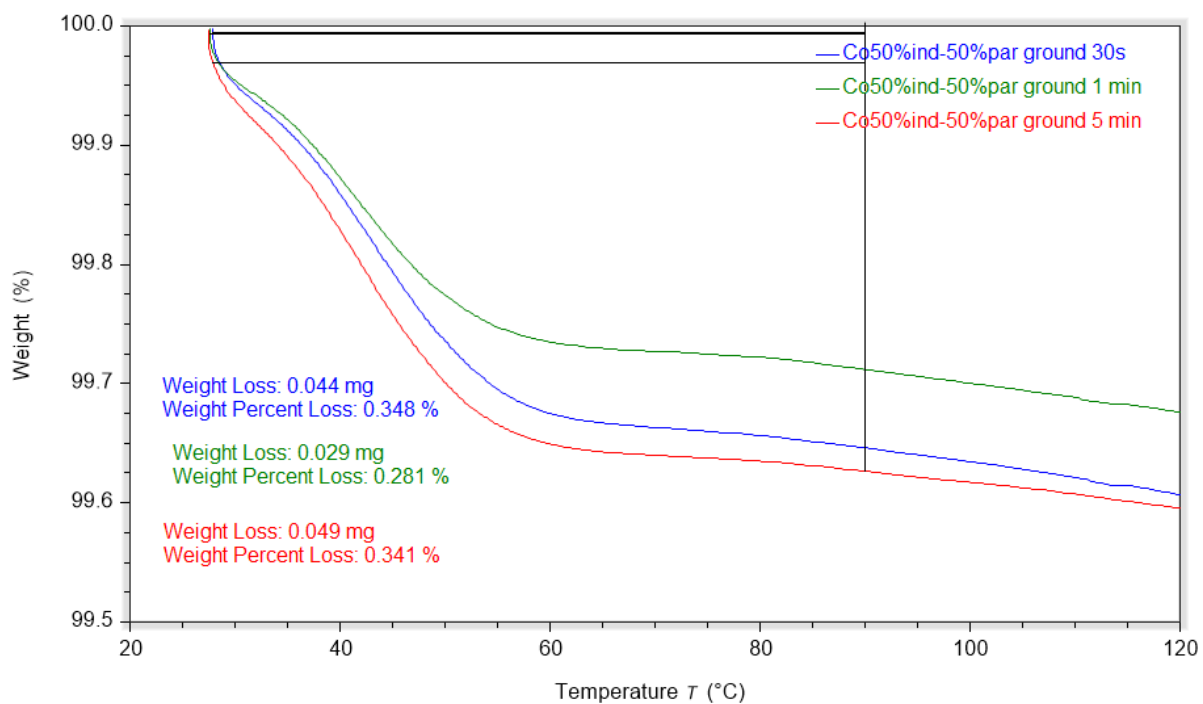

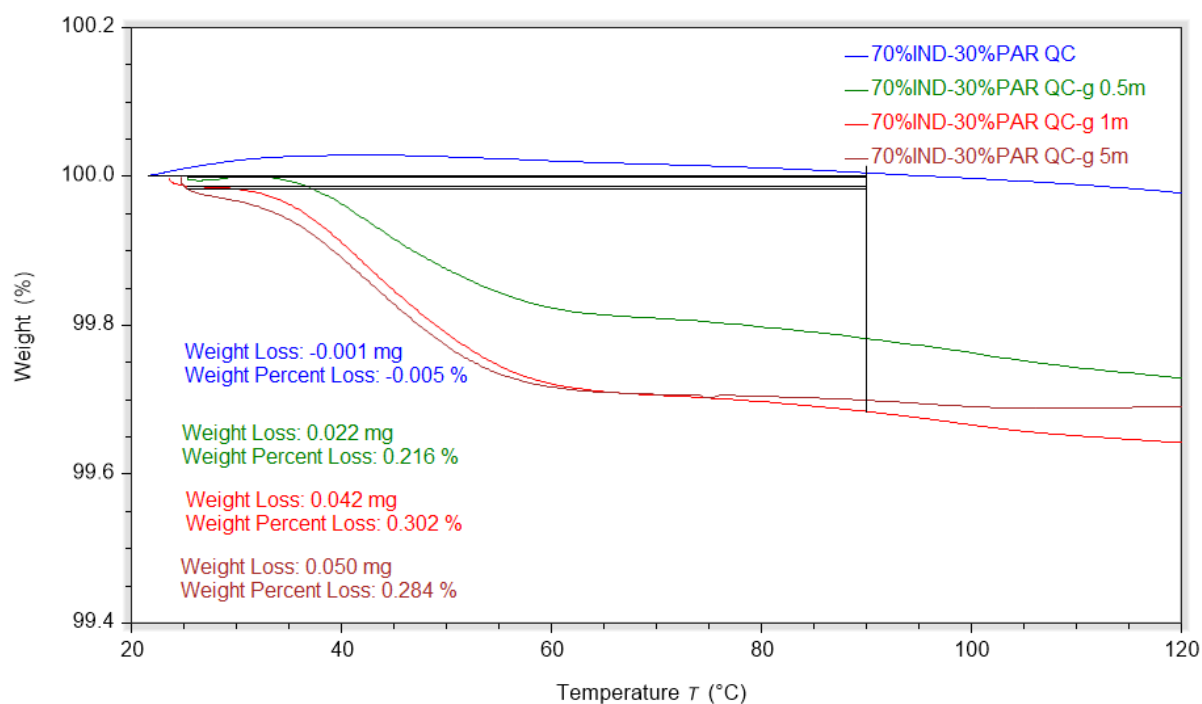

Figure S5. DSC and XRPD results of ground amorphous IND and ground amorphous PAR.

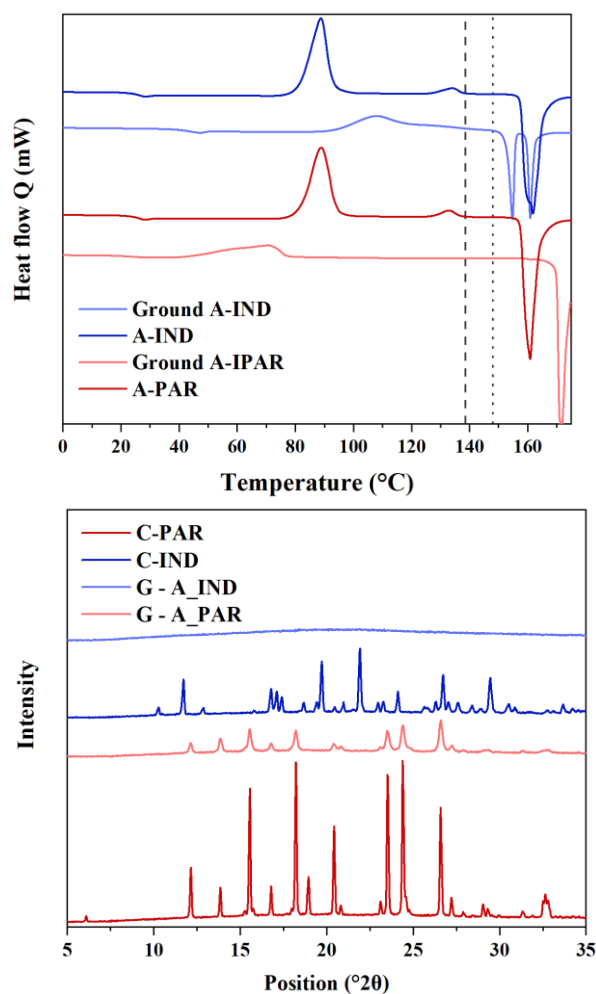

Figure S6. DSC thermographs of 30% IND - 70% PAR G-CAMS at different grinding times.

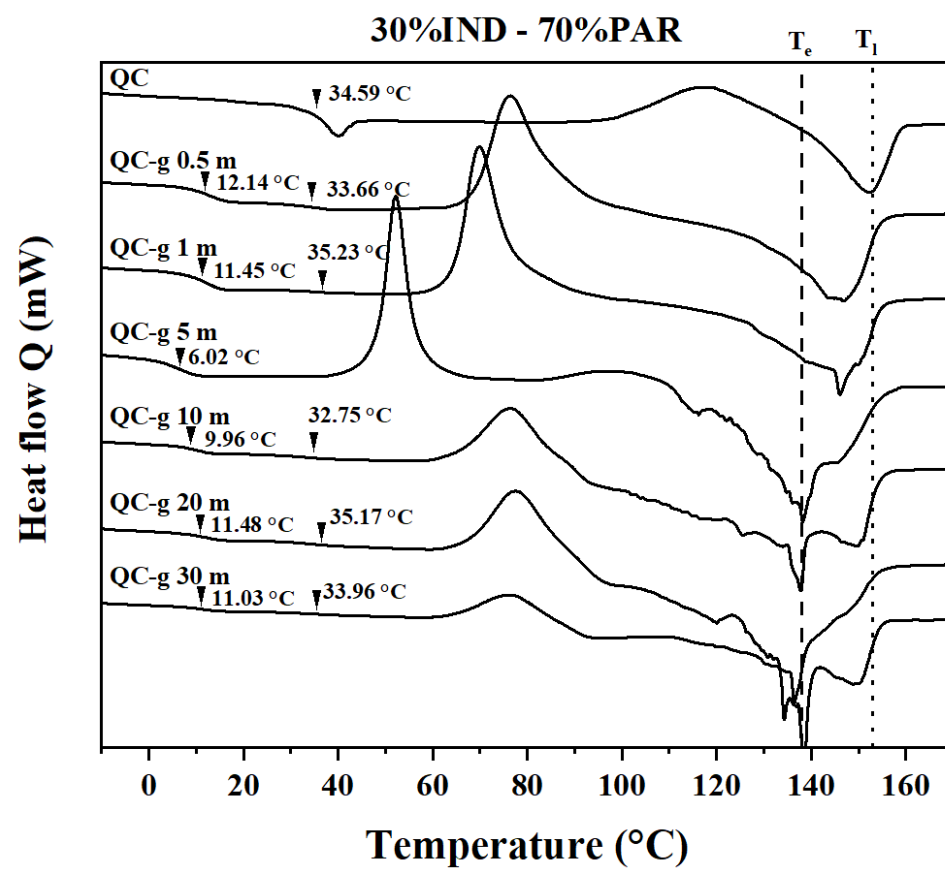

Supplement: s1 [file s1]
